# Supplementary material for: ATP6V1F is a novel prognostic biomarker and potential immunotherapy target for hepatocellular carcinoma
Source: PubMed Central journal article supplement (PMC10428557; doi:10.1186/s12920-023-01624-6), 2023-08-16
Supplement: 12920_2023_1624_MOESM1_ESM.pdf [file 12920_2023_1624_MOESM1_ESM.pdf]

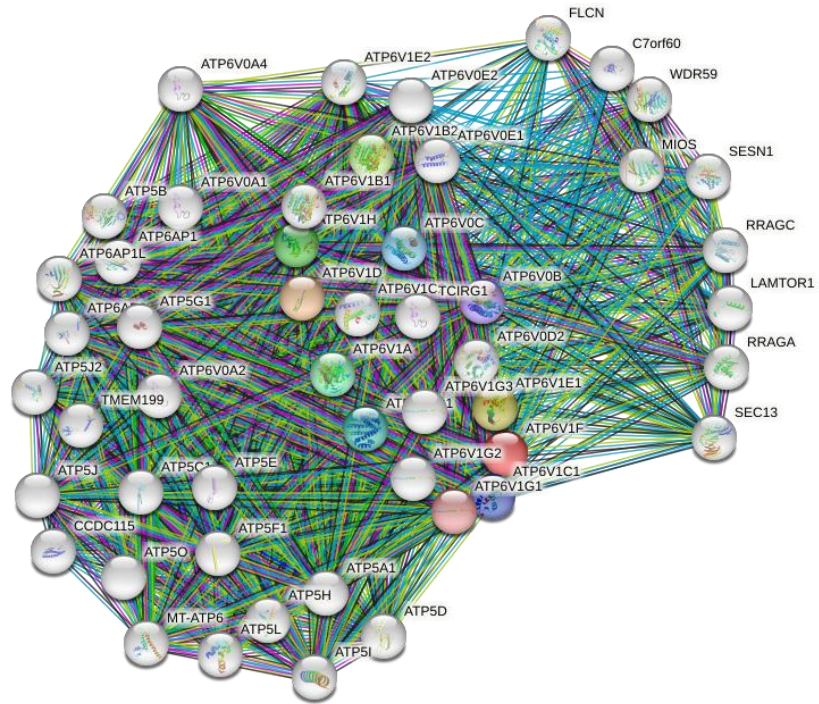

**Figure S1.** The PPI network of ATP6V1F constructed using the STRING database.

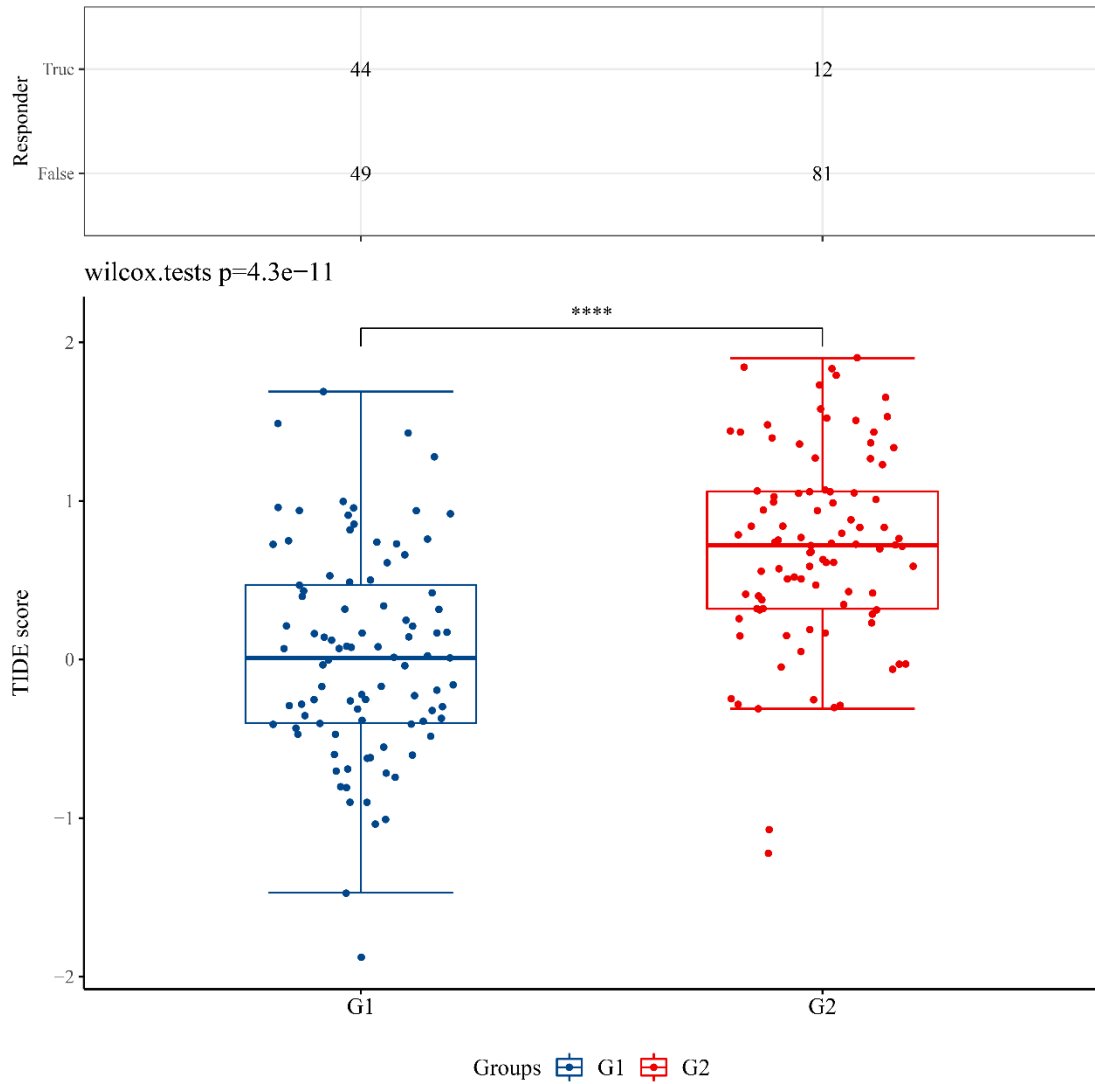

**Figure S2.** TIDE scores in ATP6V1F-low and ATP6V1F-high groups in HCC. Set the top ¼ as high expression group and the bottom ¼ as low expression group. \*\*\*\*P < 0.0001. G1: low expression group, G2: high expression group.

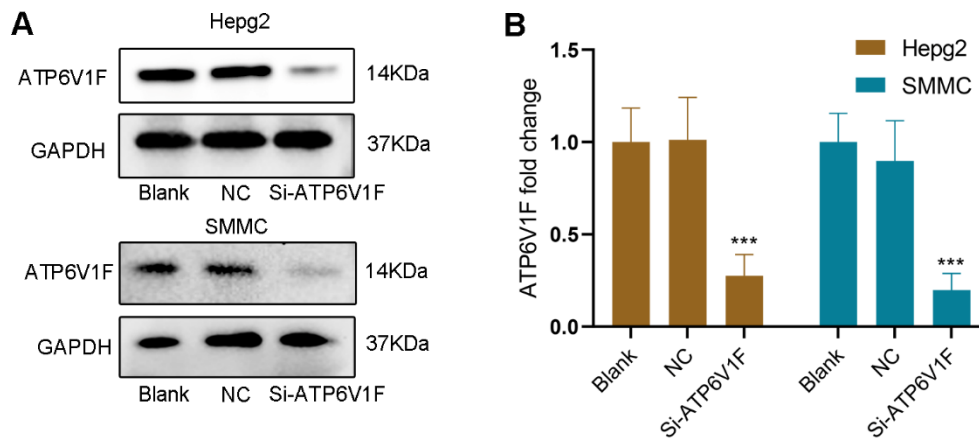

**Figure S3.** Western blot assays verified that ATP6V1F protein expression was successfully knocked down by si-ATP6V1F in Hepg2 and SMMC7721 cells (A). Statistical results of western blot assays (B). \*\*\*P < 0.001.

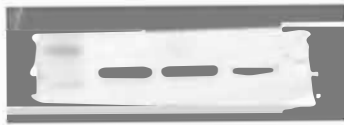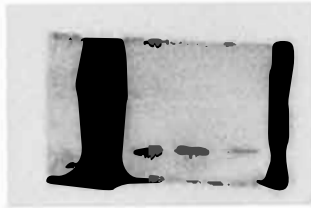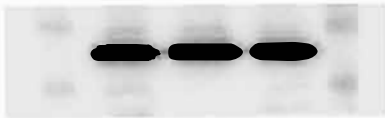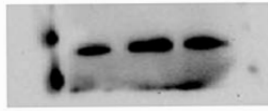

Original images of western blot assays
